# Supplementary material
Source: PubMed Central journal article supplement (PMC4580288)
Supplement: NIHMS722335-supplement-supplement_1.pdf [file NIHMS722335-supplement-supplement_1.pdf]

## METHODS

**Animals.** All mice were maintained in a pathogen-free facility, and all experiments were performed in accordance with the University of British Columbia Animal Care Committee regulations. Adult C57BL/6 mice (> 8 weeks) were used in this study. C57BL/6-CMV- $\beta$  actin-EGFP transgenic mice were a gift from I. Weissman (Stanford University, CA, USA). *In vivo* lineage tracing was performed in *Myf5-Cre-R26R3-YFP* mice, generated by breeding heterozygous *Myf5-Cre* (P. Soriano, Department of Developmental and Regenerative Biology, Mount Sinai School of Medicine, NY, USA) with *ROSA26-YFP<sup>+</sup>* reporter mice. Muscle damage was induced by intramuscular injection of 0.15  $\mu$ g notexin snake venom (Latoxan), into the tibialis anterior muscle.

**Tissue preparation.** Skeletal muscle from both hindlimbs was carefully dissected and then gently torn with tissue forceps until homogeneous. Collagenase type 2 (Sigma; 2ml of 2.5 U ml<sup>-1</sup>), in 10 mM CaCl<sub>2</sub>, was added to every two hindlimbs, and the preparation was placed at 37 °C for 30 min. After washing, a second enzymatic digestion was performed with Collagenase D (Roche Biochemicals; 1.5 U ml<sup>-1</sup>) and Dispase II (Roche Biochemicals; 2.4 U ml<sup>-1</sup>), in a total volume of 1 ml per mouse, at 37 °C for 60 min. Preparations were passed through a 40- $\mu$ m cell strainer (Becton Dickinson), and washed. Resulting single cells were collected by centrifugation at 400g for 5 min.

**Flow cytometry/FACS.** Cell preparations were incubated with primary antibodies for 30 min at 4 °C in supplemented PBS containing 2 mM EDTA and 2% FBS at  $\sim 3 \times 10^7$  cells per ml. We used the following monoclonal primary antibodies: anti-CD31 (clones MEC13.3, Becton Dickinson, and 390, Cedarlane Laboratories), anti-CD34 (clone RAM34, eBioscience), anti-CD45 (clone 30-F11, Becton Dickinson), anti-CD45.1 (clone A20, Becton Dickinson), anti-CD45.2 (clone 104, eBiosciences), anti-Sca-1 (clone D7, eBiosciences) and anti- $\alpha$ 7 integrin (produced in-house). Typical antibody dilutions used were: anti-CD31, 1:100–400; anti-CD34, 1:50–200; anti-CD45, 1:200–400; anti-CD45.1, 1:200–400; anti-CD45.2, 1:200–400; anti-Sca-1, 1:2,000–5,000; anti- $\alpha$ 7 integrin, 1:100–400. For all antibodies we performed fluorescence minus one controls by staining with appropriate isotype antibodies. Where necessary, biotinylated primary antibodies were detected using streptavidin coupled to phycoerythrin, allophycocyanin or FITC (Caltag). To assess viability, cells were stained with propidium iodide (1  $\mu$ g ml<sup>-1</sup>) and Hoechst 33342 (2.5  $\mu$ g ml<sup>-1</sup>) and resuspended at  $\sim 1 \times 10^7$  cells ml<sup>-1</sup> immediately before sorting or analysis.

Analysis was performed on LSRII (Becton Dickinson) equipped with three lasers. Data were collected using FACS DIVA software. Sorts were performed on a FACS Vantage SE (Becton Dickinson) or FACS Aria (Becton Dickinson), both equipped with three lasers, using a 100- $\mu$ m nozzle at 18 psi to minimize the effects of pressure on the cells. Sorting gates were strictly defined based on isotype control (fluorescence minus one) stains. Biexponential analysis was performed using FlowJo 8.7 (TreeStar) software.

**Cell culture.** Cells were grown in high-glucose Dulbecco's modified eagle medium (DMEM), supplemented with 2.5 ng ml<sup>-1</sup> bFGF (Invitrogen) 20% FBS and 10% heat-inactivated horse serum. This medium is referred to in text as 'growth medium'. Cells were seeded in tissue-culture-treated plates coated with Matrigel (Becton Dickinson) or Type 1 collagen (Sigma). After sorting, cells were allowed to adhere for three days, after which half the medium was changed. Media was changed every 2–4 days thereafter. For mesenchymal differentiation, we used reported conditions. Briefly, we cultured cells in DMEM with 20% FBS under the following conditions: for osteogenic differentiation, we supplemented media with 10 nM dexamethasone, 5 mM  $\beta$ -glycerophosphate and 50  $\mu$ g ml<sup>-1</sup> ascorbic acid; for adipogenic differentiation, we supplemented media with 0.25  $\mu$ M dexamethasone and 0.5 mM isobutylmethylxanthine, 1  $\mu$ g ml<sup>-1</sup> insulin and 5  $\mu$ M troglitazone; for chondrogenic differentiation we pelleted cells by centrifugation at 400g for 5 min, and grew them in media supplemented with 1 ng ml<sup>-1</sup> TGF $\beta$ 1 and 50  $\mu$ g ml<sup>-1</sup> ascorbic acid. For myogenic differentiation, we used DMEM medium supplemented with 5% horse serum.

**Limiting dilution analysis.** From each test population, 1–100 cells were sorted into individual wells of a Matrigel-coated 96-well plate directly from the sorter. Cells were grown as described in the text. After three weeks, cultures were fixed and stained for MyHC and nuclei. Wells were scored for the presence of colonies (> 8 cells), cells undergoing terminal myogenic differentiation (MyHC-positive)

and lipid laden adipocytes. A minimum of 30 replicate wells was generated for each cell dose. Limiting dilution analysis calculations were based on the single hit Poisson model (see Statistics).

**Gene expression analysis.** RNA isolation was performed using RNeasy mini kits (Qiagen), and RNA quantification was performed using a ND1000 spectrophotometer (Nanodrop). Reverse transcription was performed using the High Capacity cDNA Reverse Transcription Kit (Applied Biosystems). Gene expression analysis was performed using Taqman Gene Expression Assays (Applied Biosystems), on a 7900HT Real Time PCR system (Applied Biosystems). Sequence information for the primers contained in the Taqman assays are not in the public domain, but ordering information is provided in Supplementary Information, Table S3. Data were acquired and analysed using SDS 2.0 and SDS RQ Manager software (Applied Biosystems).

**Transplantation.** Host mice (wild type) were anesthetized using isoflurane. Donor cells were isolated from transgenic mice ubiquitously expressing GFP<sup>+</sup>. Cells were sorted into cold DMEM and collected by centrifugation at 450g for 5 min. For subcutaneous transplantation, cells were resuspended in 25  $\mu$ l Matrigel and loaded into an ice-cold needle and syringe immediately before injection. Cells were injected into the subscapular region, with control cells injected on the contralateral side. For intramuscular transplantation, sorted cells were resuspended in 20  $\mu$ l sterile PBS and injected into the tibialis anterior. Tissues were collected after three weeks.

**Histology and imaging.** Before tissue collection, animals were perfused transcardially with 20 ml PBS/ 2 mM EDTA, followed by 20 ml 4% paraformaldehyde (PFA). Tissues were processed for cryosectioning or paraffin-embedding using standard methods. Immunostaining was performed using monoclonal antibodies against perilipin (Sigma), a smooth muscle actin (Sigma), ER-TR7 (Novus), FSP1 (Novus) myosin heavy chain (in-house) or BrdU (Becton Dickinson). Briefly, samples were permeabilized in 0.3% Triton X-100 (Sigma) in PBS, and blocked for 2 h at room temperature in PBS containing 25% normal goat serum (NGS), 0.3% Triton X-100, 3% bovine serum albumin (BSA) and 0.1% Na<sub>2</sub>S<sub>2</sub>O<sub>8</sub>. Cells were stained overnight at 4 °C using antibody diluted in 10% NGS, 0.3% Triton X-100, 3% BSA and 0.1% Na<sub>2</sub>S<sub>2</sub>O<sub>8</sub>. Primary antibody was detected using goat anti-mouse IgG antibodies conjugated to Alexa 568 or 488 (Molecular Probes), or using the anti-Mouse IgG HRP detection kit (Becton Dickinson).

Cells were visualized using a microscope (Axiovert 200 for inverted microscopy, AxioPlan2 for conventional microscopy; Carl Zeiss Microimaging) and images were acquired using a charge-coupled device camera (Retiga EXi, Axiovert 200 or Retiga EX, AxioPlan2; qImaging) and OpenLab4 software (Improvision). To confirm the specificity of the GFP signal, we compared the signal with non-specific autofluorescent background in all other channels<sup>45</sup>. Confocal microscopy was performed using a Nikon C1 laser scanning confocal microscope equipped with lasers at 488 nm, 568 nm and 633 nm. Images were captured using the least exposure time possible, and manipulation of brightness and contrast, colouring adjustments and assembly into figures were performed using ImageJ, OpenLab4 (Improvision), Illustrator CS3 (Adobe) and Photoshop CS3 (Adobe).

**BrdU-labelling studies.** For *in vivo* studies, BrdU was administered in drinking water (0.8 g l<sup>-1</sup> in 2% sucrose) and by intraperitoneal injection (100 mg kg<sup>-1</sup>). In cell culture experiments, 10  $\mu$ M BrdU was added to culture medium. BrdU treatment regimens are described in the text. For flow cytometric analysis, cells were stained for surface markers as indicated. Samples were fixed in 2% PFA for 20 min, and membranes were permeabilized in 0.2% saponin for 10 min. Cells were treated with 30  $\mu$ g DNase I (Sigma) for 1 h at 37 °C, after which a 1:25 dilution of anti-BrdU (clone PRB-1, Invitrogen) was applied to the samples for 30 min at room temperature.

**MTT assay.** Assays were performed in 96-well cell cultures. MTT (3-(4,5-dimethylthiazol-2-yl)-2,5-diphenyltetrazolium bromide) solution (50  $\mu$ l of 5 mg ml<sup>-1</sup> dissolved in PBS) was added to each well and samples were incubated at 37 °C for 4 h. The solution was removed, and the purple formazan salt product resulting from the reduction of the yellow MTT was solubilized in 100  $\mu$ l DMSO and quantified spectrophotometrically at 570 nm (SpectraMax 190, Molecular Devices).

**Statistics.** Preliminary analysis and data collation was performed using Microsoft Excel. Statistical tests, including Student's *t*-test, ANOVA and regression analyses were performed using Prism 4 (GraphPad Software). Analysis of limiting dilution data were performed using a web application made available by the Walter and Eliza Hall Institute of Medical Research, Melbourne, Australia (<http://bioinf.wehi.edu.au/software/limdil/>)<sup>46</sup>. This software tests departures from the single-hit Poisson model using a generalized linear model. Error bars in all figures, including Supplementary Information, represent the mean  $\pm$  s.e.m., with the exception of Fig. 7a, which

represent the mean  $\pm$  s.d. Raw data points for all experiments presented as averages in the main figures are available in Supplementary Information, Table S2.

44. Srinivas, S. *et al.* Cre reporter strains produced by targeted insertion of EYFP and ECFP into the *ROSA26* locus. *BMC Dev. Biol.* **1**, 4 (2001).
45. Brazelton, T. R. & Blau, H. M. Optimizing techniques for tracking transplanted stem cells *in vivo*. *Stem Cells* **23**, 1251–1265 (2005).
46. Shackleton, M. *et al.* Generation of a functional mammary gland from a single stem cell. *Nature* **439**, 84–88 (2006).

DOI: 10.1038/ncb2015

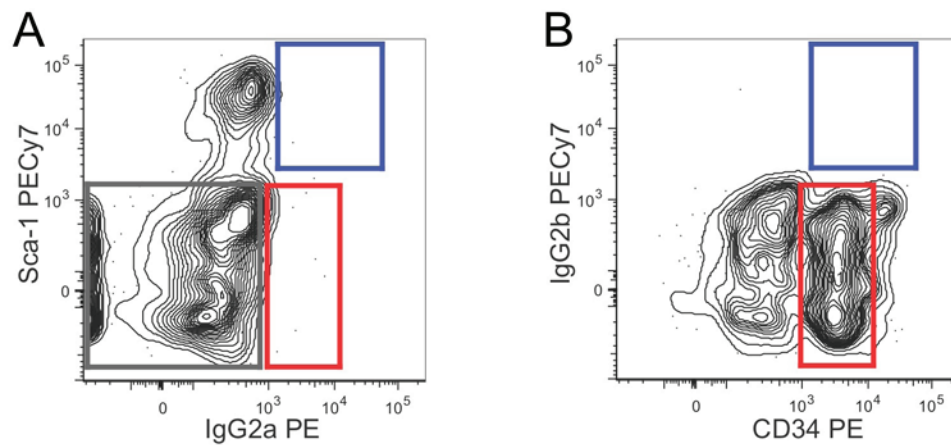

**Figure S1** Confirmation of Sca-1 CD34 stain specificity using isotype-matched control antibodies. Skeletal muscle preparations were stained and gated as described in the text (Hoechst<sup>mid</sup> P1<sup>lo</sup> CD45<sup>-</sup> CD31<sup>-</sup>). Isotype stains

were the same as normal stains except that one antibody was substituted with an isotype-matched, non-specific antibody, conjugated to the same fluorophore. **(A)** CD34 PE Isotype control. **(B)** Sca-1 PE/Cy7 Isotype control.

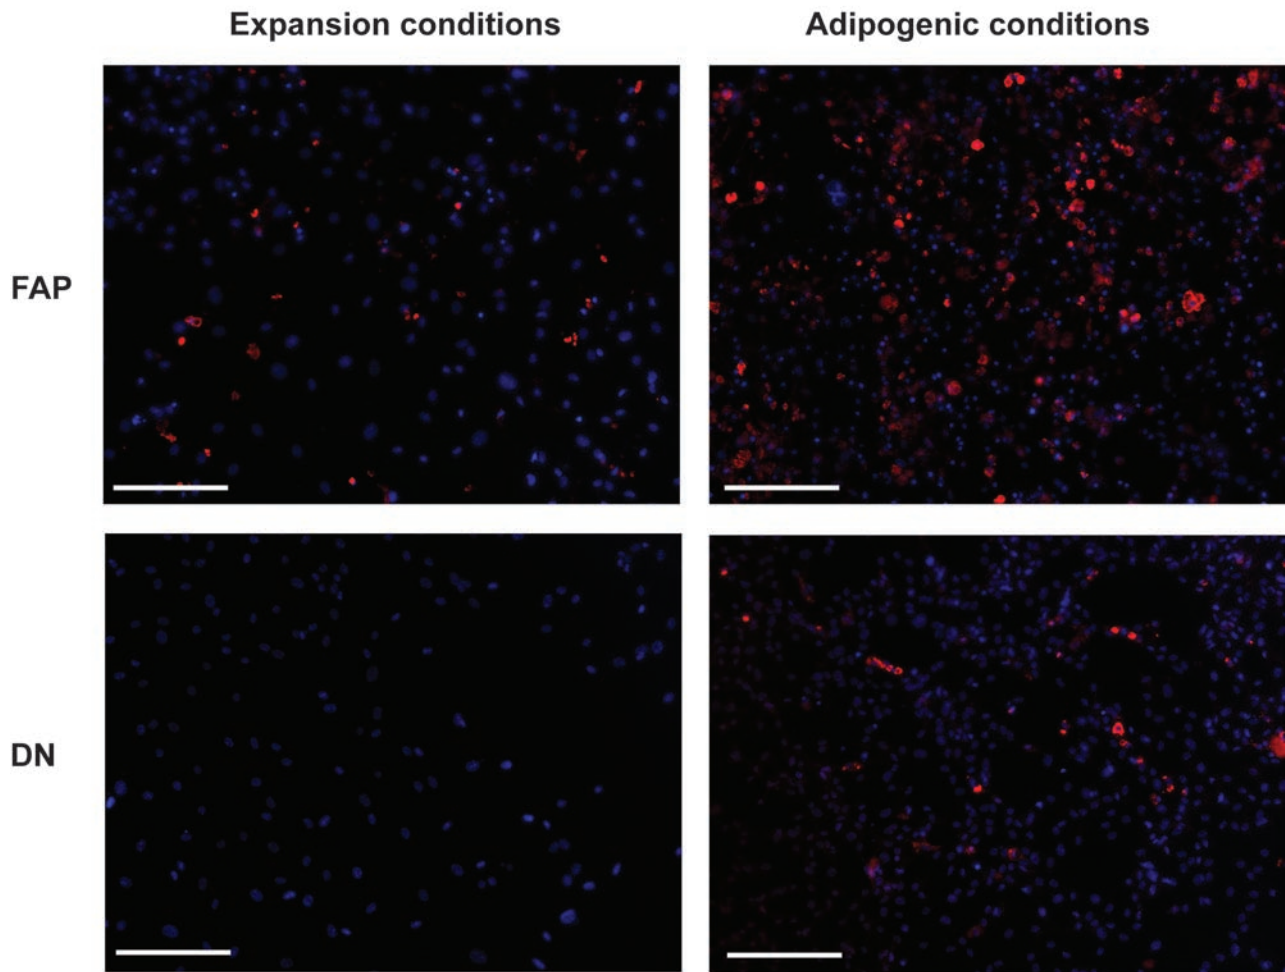

**Figure S2** A latent adipogenic potential of skeletal muscle Sca-1<sup>+</sup> CD34<sup>-</sup> (DN) cells is revealed in the presence of PPAR $\gamma$  agonists. DN cells and FAPs were FACS purified as described and cultured in either expansion conditions or adipogenic conditions containing PPAR $\gamma$  agonists for 17 days. Samples were stained with myosin heavy chain and perilipin to identify differentiated cells. Independently of the conditions, neither cell

type gave rise to MHC positive structures, suggesting that these two cell subsets do not possess myogenic potential. FAPs spontaneously gave rise to perilipin positive cells in expansion conditions and, more efficiently, in adipogenic conditions. DN cells were capable to generate small numbers of perilipin expressing adipocytes only when exposed to adipogenic medium. Scale bar: 100 $\mu$ m

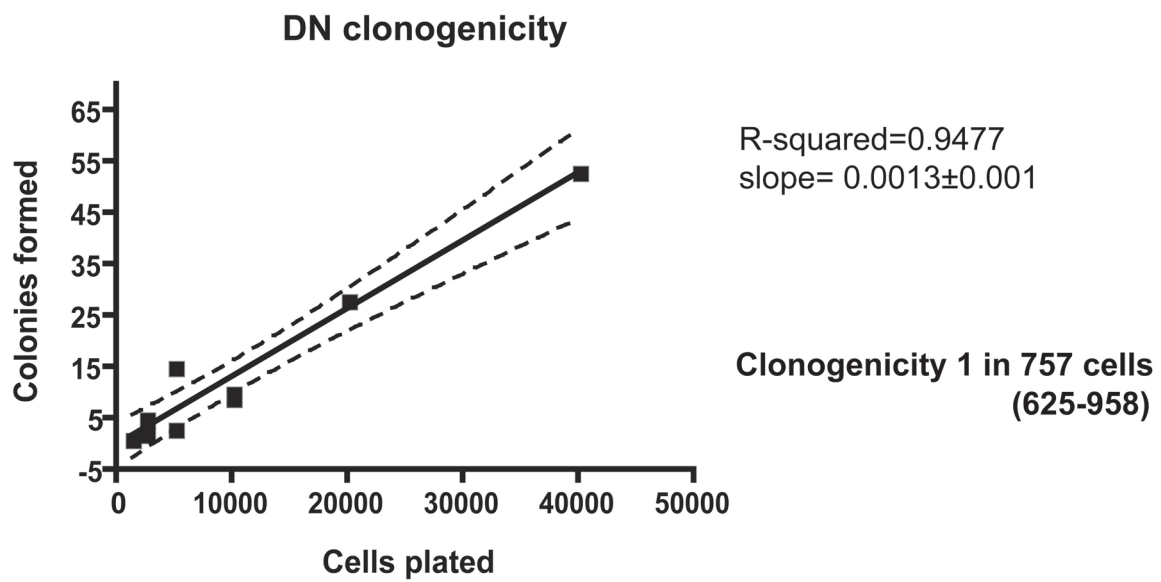

**Figure S3** Linear regression of colony forming data from freshly isolated skeletal muscle DN (Sca-1<sup>-</sup> CD34<sup>-</sup>) cells. Hoechst<sup>mid</sup> PI<sup>lo</sup> CD45<sup>-</sup> CD31<sup>-</sup>. Sca-1<sup>-</sup> CD34<sup>-</sup> cells were sorted and seeded at the indicated densities in a 5cm matrigel-coated dish and cultivated in growth medium for 2 weeks. After fixation,

colonies (defined as clusters of more than 10 cells) were counted, and then plotted against the number of cells inoculated. Dashed lines represent the 95% confidence regression band. Clonogenicity was determined from the slope of the curve, and the 95% confidence interval is shown in brackets.

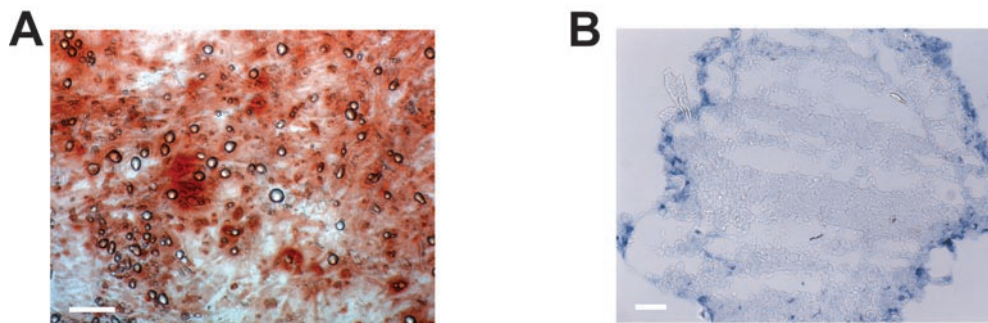

**Figure S4** Skeletal muscle Sca-1<sup>+</sup> CD34<sup>+</sup> cells do not form bone or cartilage. Cells were previously gated for Hoechst<sup>mid</sup> PI<sup>lo</sup> CD45<sup>-</sup> CD31<sup>-</sup>. **(A)** DP cells were grown in osteogenic conditions for 10 weeks, and then stained with alizarin red for visualization of calcified nodules. Despite the presence of alizarin red staining, we observed no areas that could be identified as osteogenic nodules. Sparse adipocytes were observed throughout the

cultures. Scale bar at 50 $\mu$ m. **(B)** DP cell pellets were grown in chondrogenic conditions for 8 weeks, cryosectioned (10 $\mu$ m), and then stained for glycosaminoglycans with alcian blue. Although non-specific staining could be observed on the periphery of the pellet, no staining was observed throughout the pellet, and no characteristic chondrocyte morphology was observed. (Scale bar at 50 $\mu$ m).

**Analysis of gene expression in sorted FAPs**

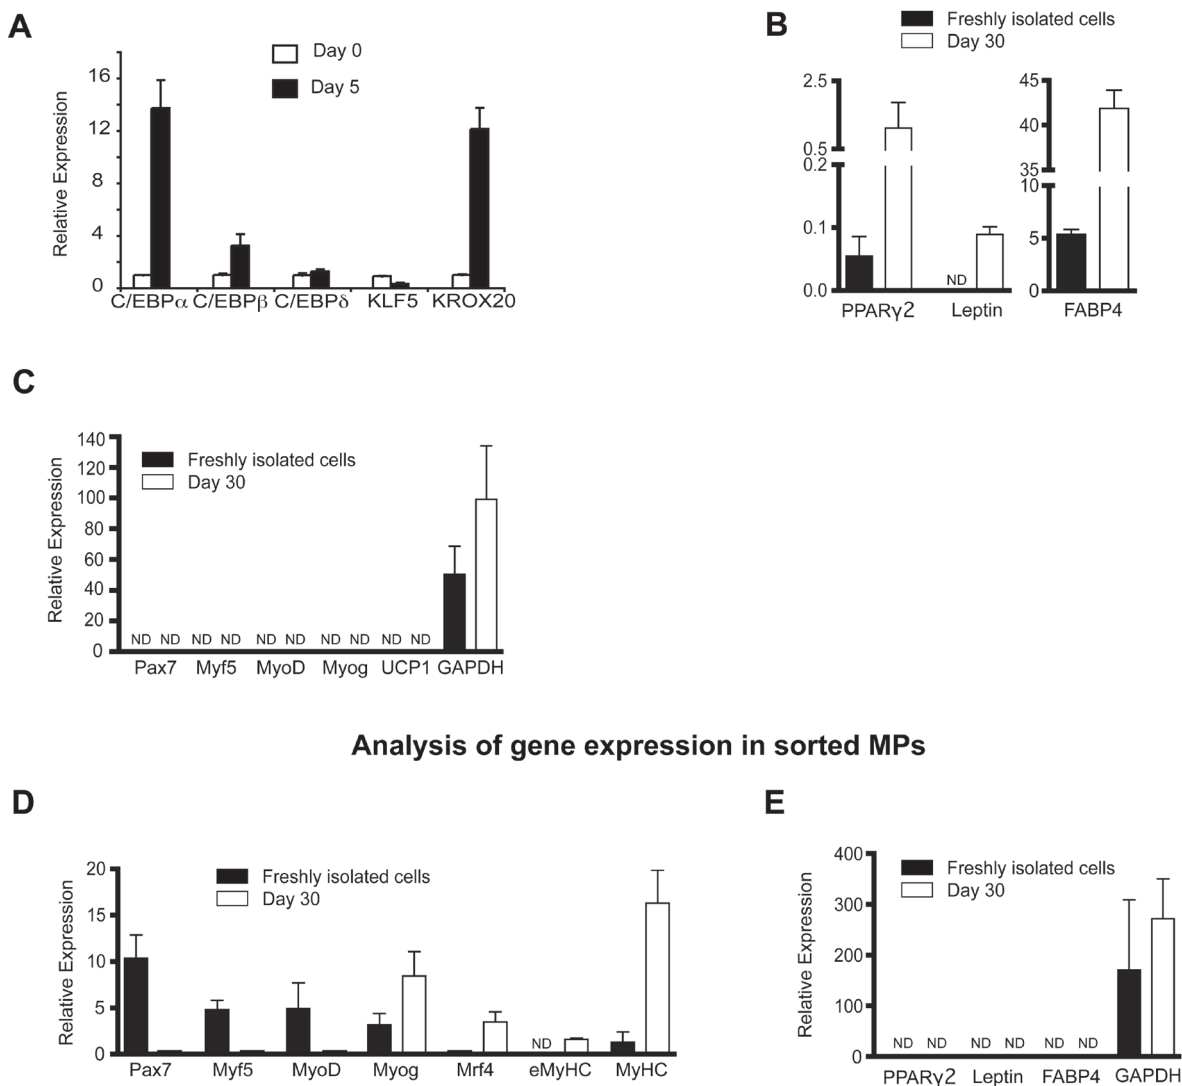

**Figure S5** Quantitative gene expression in sorted cells. Muscle-resident adipogenic (lin<sup>-</sup> Sca-1<sup>+</sup> CD34<sup>+</sup>) and myogenic (lin<sup>-</sup> Sca-1<sup>-</sup> CD34<sup>+</sup>) cells were sorted and cultured as described in text. Differentiated cells arose spontaneously in growth media and were analyzed at the time points indicated. We performed qRT-PCR analyses using Taqman probe and primer sets spanning exon-exon boundaries. All values are expressed relative to TBP expression. ND= no signal detected. **(A)** Upregulation of preadipocyte

markers on FAPs after 5 days of culture. **(B)** Upregulation of markers of mature adipocytes in FAPs after terminal differentiation (30 days). **(C)** Adipogenic cells do not express skeletal muscle or brown fat genes. **(D)** Myogenic cells express markers common to satellite cells immediately after sorting, and markers of mature and regenerating muscle after terminal differentiation. **(E)** Myogenic cells do not express genes common to white adipocytes.



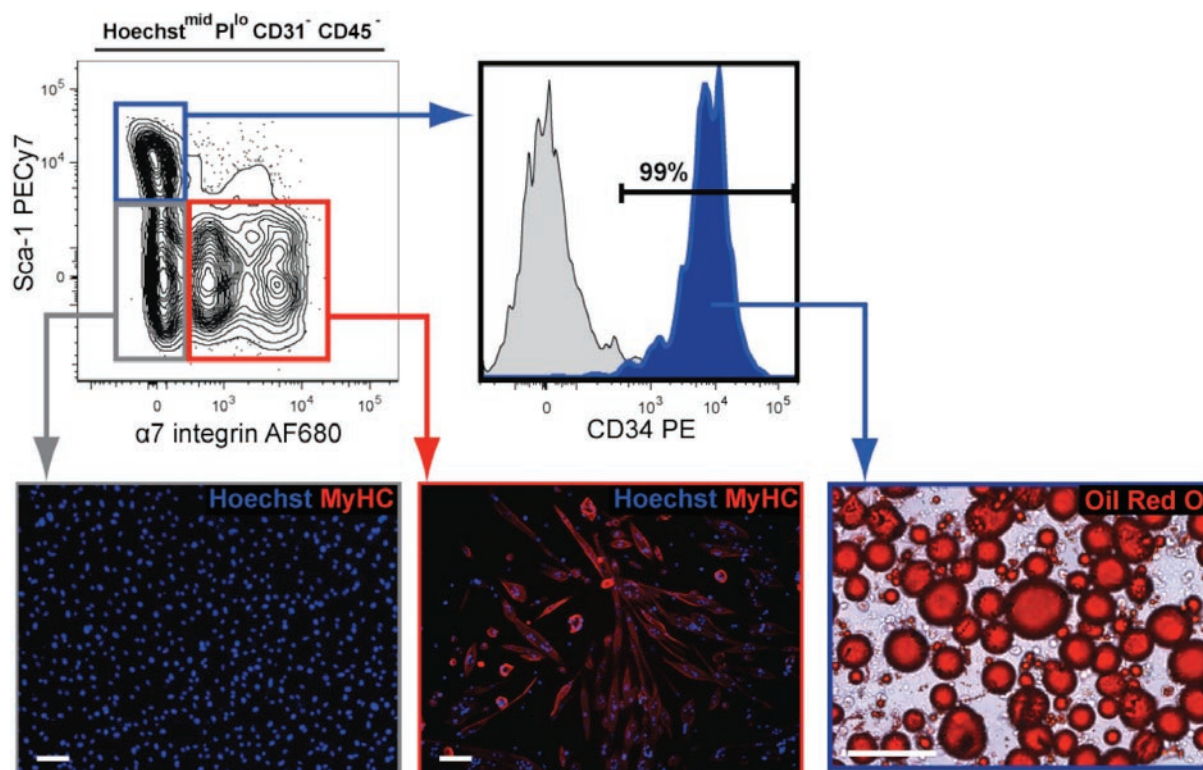

**Figure S6** An alternative strategy using  $\alpha 7$  integrin to identify adipogenic and myogenic cells from dissociated skeletal muscle. Skeletal muscle preparations were gated for Hoechst<sup>mid</sup> PI<sup>lo</sup> CD45<sup>-</sup> CD31<sup>-</sup> (lin<sup>-</sup>) cells, and then analyzed for the expression of Sca-1 and  $\alpha 7$  integrin. Lin<sup>-</sup> Sca-1<sup>-</sup>  $\alpha 7$ <sup>-</sup> cells did not differentiate into myosin heavy chain (MyHC)-expressing myotubes (grey

gate, left image), revealing that all myogenic activity was found exclusively in the lin<sup>-</sup>  $\alpha 7$ <sup>+</sup> Sca-1<sup>-</sup> population (red gate, middle image). All adipogenic activity was found exclusively in the lin<sup>-</sup>  $\alpha 7$ <sup>-</sup> Sca-1<sup>+</sup> population (blue gate, right image), and over 99% of these cells expressed CD34. Greyed out histogram represents the CD34-PE isotype control. All scale bars at 100 $\mu$ m.



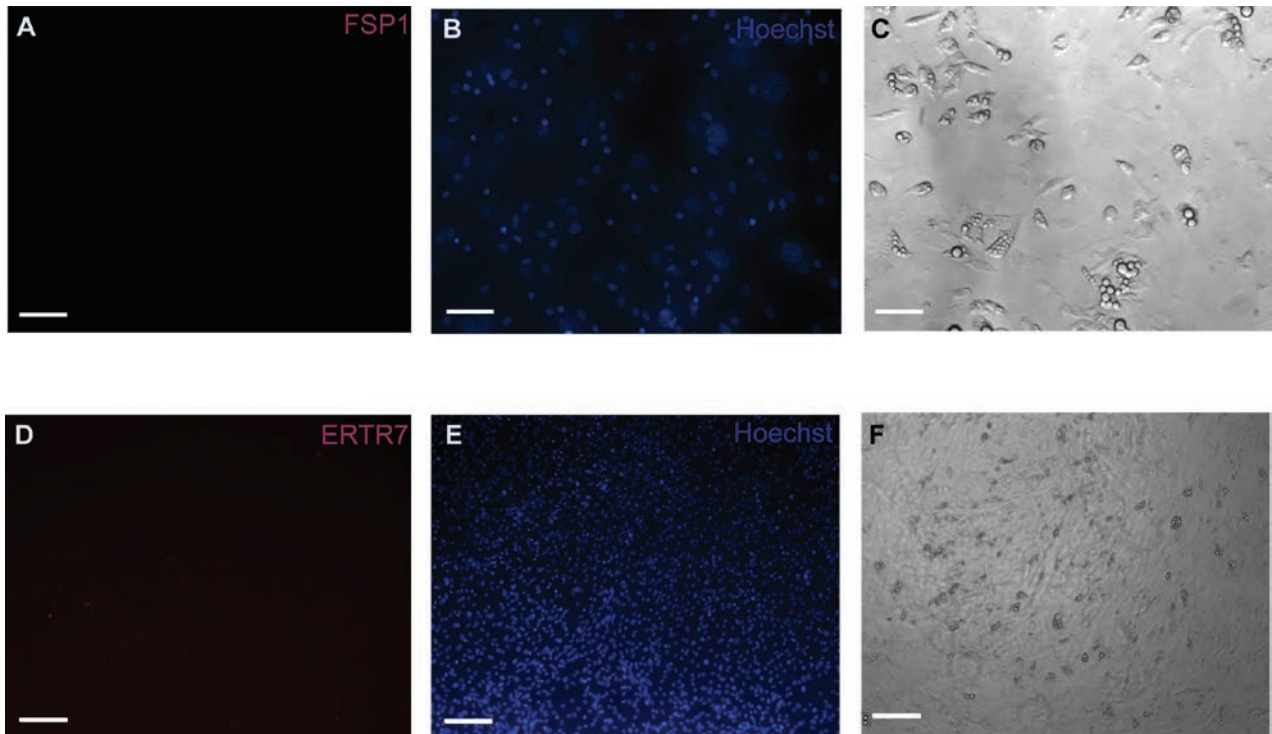

**Figure S7** Negative controls for ER-TR7 and FSP-1 staining of FAPs. No staining was detected when parallel cultures of FAPs were stained in an identical fashion as those shown in Fig 2, but omitting the primary antisera. **(A, B, C)** FSP-1

controls. Scale bars: 50 $\mu$ m **(B)** shows Hoechst staining and **(C)** brightfield image of the sample shown in **(A)**. **(D, E, F)** ER-TR7 controls. Scale bars: 100 $\mu$ m **(E)** shows Hoechst staining and **(D)** brightfield image of the sample shown in **(D)**.

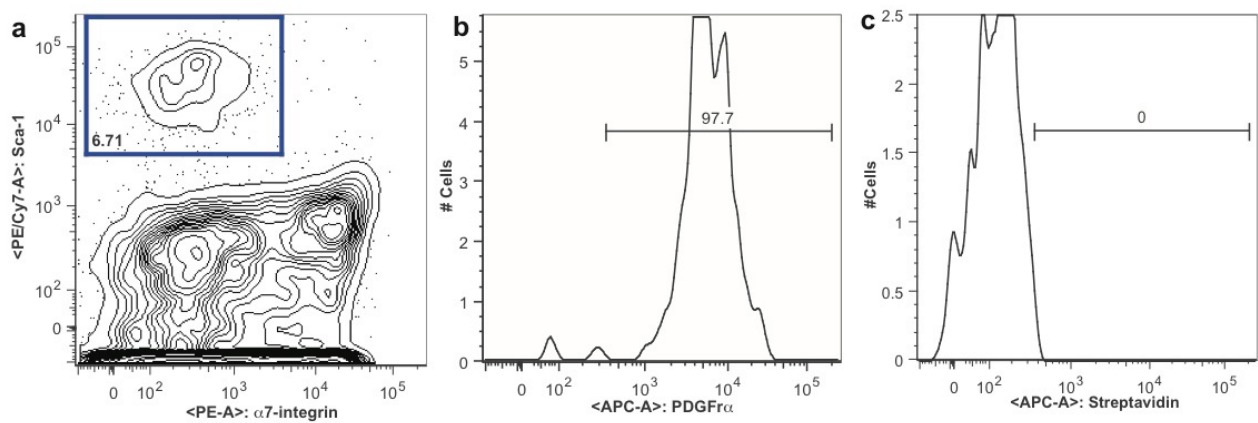

**Figure S8** Expression of PDGFR $\alpha$  in CD31<sup>-</sup>, CD45<sup>-</sup>, Sca1<sup>+</sup>,  $\alpha$ 7-integrin<sup>-</sup> FAPs. The frequency of FAPs expressing PDGFR $\alpha$  was investigated by flow cytometry. Hoechst<sup>+</sup>, PI<sup>-</sup>, CD31<sup>-</sup>, CD45<sup>-</sup> cells were gated for the expression

of Sca-1 (a). Nearly all of these cells express PDGFR $\alpha$ , as shown in (b). (c) Negative control showing similarly stained and gated cells that were not exposed to the anti-PDGFR $\alpha$  antibodies.

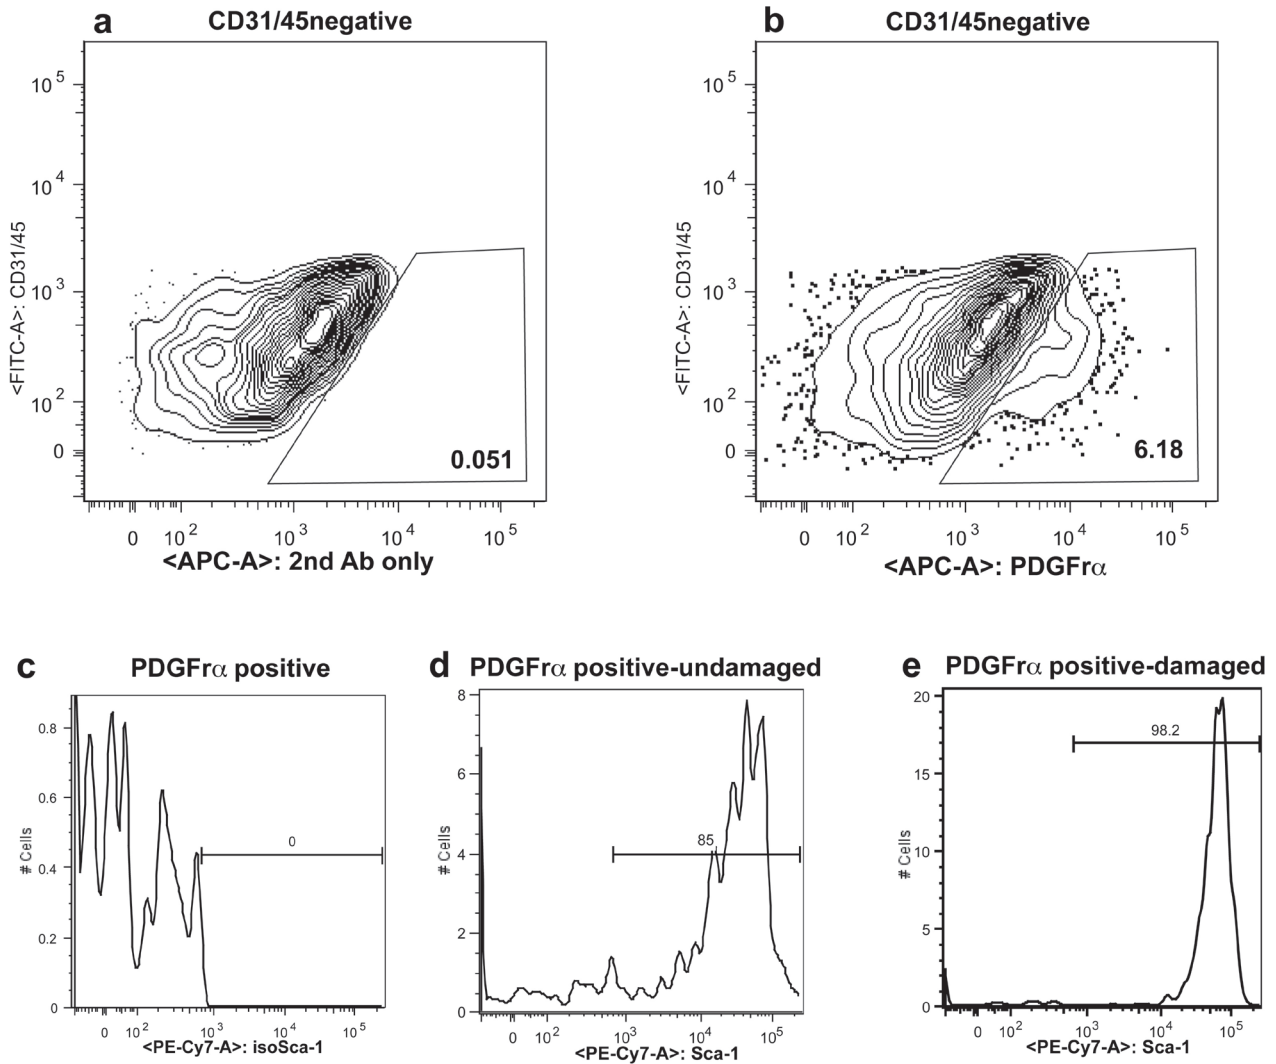

**Figure S9** Sca-1<sup>+</sup>,  $\alpha$ 7 integrin<sup>-</sup> cells are the main population expressing PDGFR $\alpha$  in skeletal muscle. The overlap between PDGFR $\alpha$  expressing cells and Sca1<sup>+</sup>,  $\alpha$ 7 integrin<sup>-</sup> fibro/adipogenic progenitors was investigated in the CD31, CD45 negative fraction from dissociated muscle samples. (a) Negative controls that were not incubated with anti-PDGFR-biotin primary antibody confirm the specificity of the stain and were used to set the gate

identifying positive cells (shown in b). (c,d) PDGFR $\alpha$ <sup>+</sup> cells were stained with either anti-Sca-1 antibodies or with isotype-matched negative controls. (d) Over 85% of PDGFR $\alpha$  expressing cells also express Sca-1 (e) The percentage of PDGFR $\alpha$  expressing cells also expressing Sca-1 increased three day after damage. No  $\alpha$ 7-integrin expression was detected on PDGFR $\alpha$  positive cells (not shown).

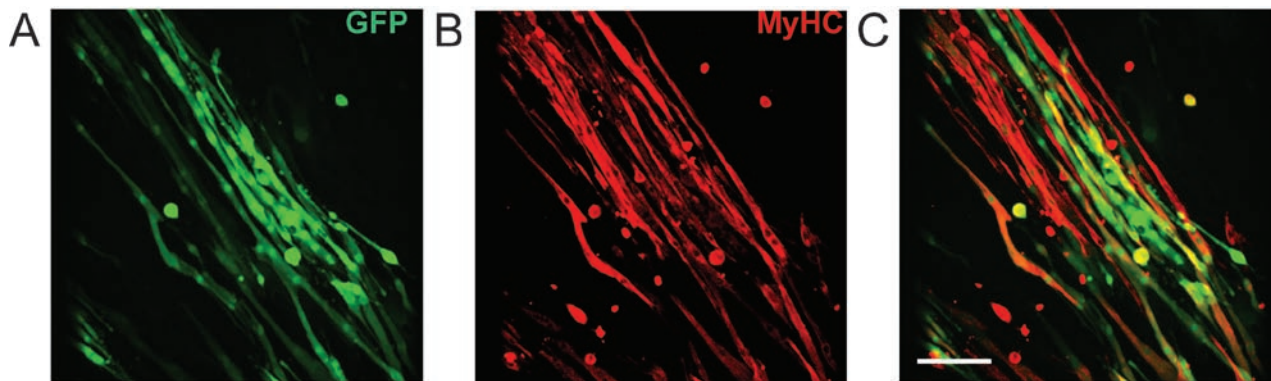

**Figure S10** Co-cultivation control experiment. This figure shows data from a control experiment for Figure 3A. Equal numbers of MPs sorted from transgenic GFP<sup>+</sup> and wildtype animals were co-cultivated for 14 days.

Participation of both GFP<sup>+</sup> and GFP<sup>-</sup> MPs to the myogenic lineage was confirmed by microscopy. Scale bar at 100 $\mu$ m. **(A)** GFP<sup>+</sup> myotubes. **(B)** Myosin Heavy Chain immunostain. **(C)** Merge.

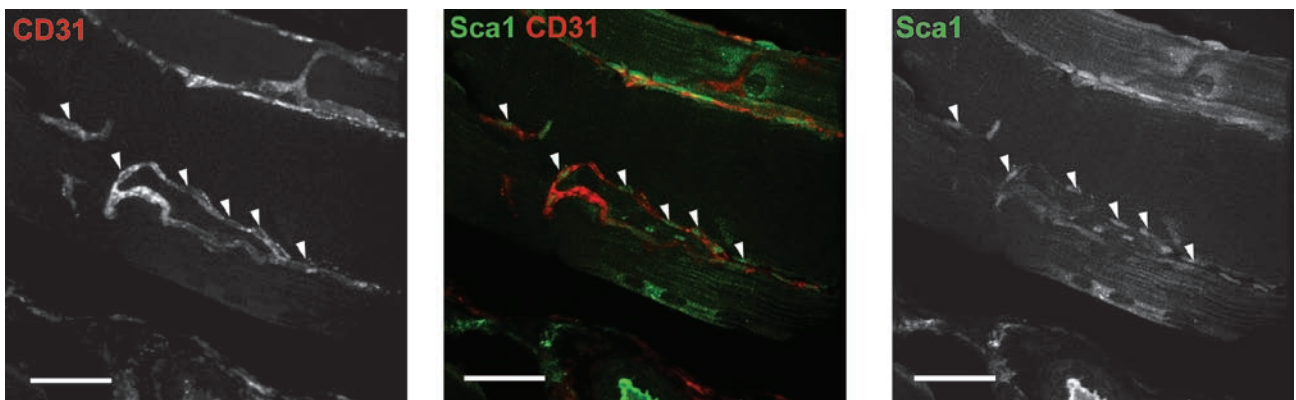

**Figure S11** Sca-1<sup>+</sup> mononuclear cells appear associated with vessels in undamaged skeletal muscle. Sca-1<sup>+</sup> mononuclear cells are found in close contact with myofiber associated blood vessels in undamaged muscle. A maximum intensity projection of a confocal Z-stack is shown. Scale bar: 100 $\mu$ m.

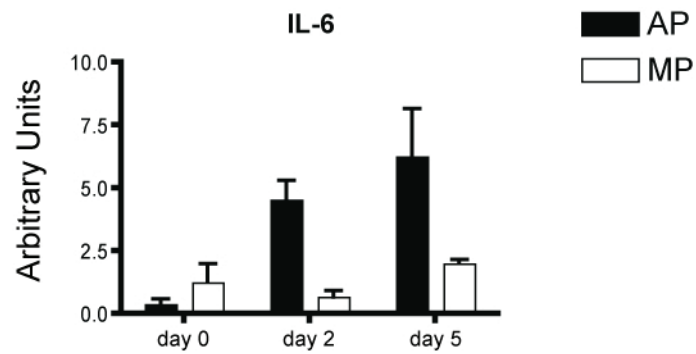

**Figure S12** IL-6 expression is upregulated in FAPs in response to muscle damage. Following muscle damage, MPs and FAPs were sorted at the indicated time points and expression of IL-6 analyzed by qRT-PCR.



**Supplementary Table 1. Summary table of the developmental potentials detected in the different culture conditions used.**

DN cells and FAPs were FACS purified as described and cultured in either growth, osteogenic, chondrogenic or adipogenic conditions containing PPAR $\gamma$  agonists. Cultures were considered positive for bone based on the presence of mineralized (alizarin red positive) bone nodules. Positive for cartilage based on the presence of Alcian blue positive matrix. Positive for muscle based on the presence of myosin heavy chain positive structures. Positive for fat based on the presence of cells containing perilipin or oil red positive vacuoles.

| Growth medium | CD34 <sup>-</sup> Sca1 <sup>-</sup> (DN) | CD34 <sup>+</sup> Sca1 <sup>-</sup> (MP) | CD34 <sup>+</sup> Sca1 <sup>+</sup> (FAP) |
|---------------|------------------------------------------|------------------------------------------|-------------------------------------------|
| Bone          | -                                        | -                                        | -                                         |
| Muscle        | -                                        | +                                        | -                                         |
| Fat           | -                                        | -                                        | +                                         |

| Osteogenic medium | CD34 <sup>-</sup> Sca1 <sup>-</sup> (DN) | CD34 <sup>+</sup> Sca1 <sup>-</sup> (MP) | CD34 <sup>+</sup> Sca1 <sup>+</sup> (FAP) |
|-------------------|------------------------------------------|------------------------------------------|-------------------------------------------|
| Bone              | +                                        | -                                        | -                                         |
| Muscle            | -                                        | +                                        | -                                         |
| Fat               | -                                        | -                                        | +                                         |

| Chondrogenic medium | CD34 <sup>-</sup> Sca1 <sup>-</sup> (DN) | CD34 <sup>+</sup> Sca1 <sup>-</sup> (MP) | CD34 <sup>+</sup> Sca1 <sup>+</sup> (FAP) |
|---------------------|------------------------------------------|------------------------------------------|-------------------------------------------|
| Cartilage           | +                                        | -                                        | -                                         |

| Adipogenic medium | CD34 <sup>-</sup> Sca1 <sup>-</sup> (DN) | CD34 <sup>+</sup> Sca1 <sup>-</sup> (MP) | CD34 <sup>+</sup> Sca1 <sup>+</sup> (FAP) |
|-------------------|------------------------------------------|------------------------------------------|-------------------------------------------|
| Muscle            | -                                        | +                                        | -                                         |
| Fat               | +                                        | -                                        | +                                         |

| Myogenic medium | CD34 <sup>-</sup> Sca1 <sup>-</sup> (DN) | CD34 <sup>+</sup> Sca1 <sup>-</sup> (MP) | CD34 <sup>+</sup> Sca1 <sup>+</sup> (FAP) |
|-----------------|------------------------------------------|------------------------------------------|-------------------------------------------|
| Muscle          | -                                        | +                                        | -                                         |

Supplementary table 2: Raw data for all experiments included

**Figure 5c** (each data point comes from an individual animal)

| % BrdU+ APs    |       |       |       |       |       |       |      |
|----------------|-------|-------|-------|-------|-------|-------|------|
| BrdU Pulse Day |       |       |       |       |       |       |      |
| <b>0-1</b>     | 0.00  | 1.32  | 0.59  | 0.38  | 0.08  |       |      |
| <b>1-2</b>     | 12.90 | 16.70 | 23.93 | 24.95 | 18.89 |       |      |
| <b>2-3</b>     | 25.00 | 17.10 | 8.94  | 40.08 | 21.17 |       |      |
| <b>3-4</b>     | 10.80 | 13.20 | 24.40 | 49.94 | 45.30 | 59.18 | 49.5 |
| <b>4-5</b>     | 0.00  | 24.14 | 38.30 | 13.50 | 15.20 | 21.10 |      |
| <b>5-6</b>     | 3.45  | 5.13  | 9.73  |       |       |       |      |
| <b>6-7</b>     | 0.00  | 2.44  | 0.00  |       |       |       |      |
| <b>9-10</b>    | 0.00  | 0.00  | 0.00  | 1.07  | 3.39  | 1.29  |      |
| <b>13-14</b>   | 0.00  | 0.00  | 0.79  | 0.00  | 5.66  |       |      |

  

| % BrdU+ MPs    |       |       |       |       |       |       |       |
|----------------|-------|-------|-------|-------|-------|-------|-------|
| BrdU Pulse Day |       |       |       |       |       |       |       |
| <b>0-1</b>     | 0.00  | 0.21  | 0.21  | 0.49  | 0.19  |       |       |
| <b>1-2</b>     | 6.25  | 7.81  | 10.25 | 5.62  | 10.78 |       |       |
| <b>2-3</b>     | 18.30 | 13.40 | 3.46  | 38.89 | 8.79  |       |       |
| <b>3-4</b>     | 20.20 | 26.20 | 14.00 | 54.74 | 52.75 | 71.60 | 71.75 |
| <b>4-5</b>     | 4.00  | 19.70 | 9.81  | 6.74  | 16.60 | 6.43  |       |
| <b>5-6</b>     | 2.41  | 7.79  | 6.42  |       |       |       |       |
| <b>6-7</b>     | 5.15  | 9.94  | 5.44  |       |       |       |       |
| <b>9-10</b>    | 4.00  | 0.98  | 5.31  | 1.32  | 5.69  | 1.99  |       |
| <b>13-14</b>   | 2.34  | 1.06  | 2.23  | 1.38  | 2.41  |       |       |

**Figure 5d** (each data point comes from an individual animal)

| MP/AP ratio  |           |           |           |           |           |
|--------------|-----------|-----------|-----------|-----------|-----------|
| Day post NTX | 0         | 1         | 2         | 3         | 4         |
| .            | 0.1160903 | 0.3177383 | 0.8916606 | 0.7694048 | 0.1493902 |
| .            | 0.2427484 | 0.2277777 | 0.6514887 | 0.5280196 | 0.1891386 |
| .            | 0.5204692 | 0.3856974 | 0.8560127 | 0.803865  |           |
| .            | 0.3192114 |           | 0.7579272 | 0.366540  |           |
| .            | 0.2133863 |           |           |           |           |

**Figure 7a** (each data points comes from the average of 3 measurements taken from one experiment)

| % MyHC+ GFP+ cells | MP-AP | MP-MP |
|--------------------|-------|-------|
| .                  | 60.   | 31.   |
| .                  | 60.   | 34.   |
| .                  | 57.   | 35.   |
| .                  | 55.   | 31.   |
| .                  | 77.   | 34.   |
| .                  | 47.   | 26.   |

**Figure 7b** (each data point comes from the average of 3 replicate PCR reactions, which were derived using cDNA from cells sorted from a minimum of 5 animals)

| expression relative tbp |         |         |         |         |         |         |
|-------------------------|---------|---------|---------|---------|---------|---------|
| AP:MP ratio             | 1:1     | 0.5:1   |         | 0.1:1   |         |         |
| Myogenin                | 512.000 | 560.278 | 396.177 | 398.932 | 250.732 | 254.232 |
| Mrf4                    | 0.818   | 1.064   | 0.521   | 0.403   | 0.285   | 0.321   |
| MyHC                    | 34.776  | 38.055  | 24.084  | 25.813  | 20.252  | 15.780  |

**Figure 7c** (each data point from the average of 3 replicate PCR reactions, which were derived using cDNA from cells sorted from a minimum of 5 animals)

| MPs with AP | eMyHC  |       |       |       | Mrf4  |        |       |       |       |       |
|-------------|--------|-------|-------|-------|-------|--------|-------|-------|-------|-------|
|             | 8.491  | 7.313 | 7.642 | 7.791 | 6.540 | 4.746  | 6.405 | 6.551 | 4.821 | 7.325 |
| MPs with MP | 10.000 | 9.153 | 5.686 |       |       | 10.000 | 8.131 | 4.593 |       |       |

  

| MPs with AP | MyoD  |       |       |       | Myogenin |        |       |       |       |       |
|-------------|-------|-------|-------|-------|----------|--------|-------|-------|-------|-------|
|             | 9.692 | 7.392 | 9.214 | 7.131 | 8.639    | 10.000 | 7.068 | 9.048 | 7.225 | 7.341 |
| MPs with MP | 4.543 | 4.383 | 3.605 |       |          | 6.728  | 6.535 | 4.395 |       |       |

  

| MPs with AP | Pax3  |       |       |       | Pax7  |       |       |       |       |       |
|-------------|-------|-------|-------|-------|-------|-------|-------|-------|-------|-------|
|             | 2.978 | 2.879 | 3.074 | 2.321 | 2.848 | 6.844 | 4.092 | 4.383 | 4.240 | 3.911 |
| MPs with MP | 6.508 | 7.077 | 6.031 |       |       | 8.800 | 6.949 | 5.414 |       |       |

**Figure 7d** (each data point comes from a single well)

| Co-culture |          |          |          |          |          |          |          |          |                  |           |          |          |
|------------|----------|----------|----------|----------|----------|----------|----------|----------|------------------|-----------|----------|----------|
| Day        | MP only  |          |          |          | AP only  |          |          |          | MP-AP co-culture |           |          |          |
| <b>2.</b>  | 0.025900 | 0.018300 | 0.025800 | 0.026800 | 0.002500 | 0.005900 | 0.014600 | 0.010200 | 0.006400         | -0.002400 | 0.007300 | 0.004100 |
| <b>3.</b>  | 0.018125 | 0.019925 | 0.021425 | 0.039625 | 0.015225 | 0.019925 | 0.029625 | 0.010125 | 0.015125         | 0.016125  | 0.009825 | 0.014425 |
| <b>4.</b>  | 0.096750 | 0.142250 | 0.146850 | 0.104950 | 0.080750 | 0.099550 | 0.066050 | 0.094650 | 0.068250         | 0.174750  | 0.148850 | 0.120950 |
| <b>5.</b>  | 0.382400 | 0.294800 | 0.308400 | 0.319600 | 0.123600 | 0.117500 | 0.092400 | 0.114200 | 0.306100         | 0.308200  | 0.307700 | 0.265800 |
| <b>7.</b>  | 1.513625 | 1.590625 | 1.647525 | 1.701525 | 1.030225 | 0.899725 | 1.088425 | 1.031725 | 1.864725         | 1.923425  | 1.567125 | 1.931725 |

**Figure 7e** (each data points comes from the average of 3 measurements taken from one experiment)

| %BrdU+ MPs after co-culture | MP WITH AP | MP WITH MP |
|-----------------------------|------------|------------|
| .                           | 70.909     | 73.469     |
| .                           | 62.500     | 68.889     |
| .                           | 68.085     | 56.000     |
| .                           |            | 24.138     |

**Supplementary Table 3: Applied Biosystems PCR primer pairs used.**

**Taqman Gene Expression Assay**

|             |               |
|-------------|---------------|
| C/EBP alpha | Mm00514283_s1 |
| C/EBP beta  | Mm00843434_s1 |
| C/EBP delta | Mm00786711_s1 |
| eMyHC       | Mm01332475_g1 |
| FABP4       | Mm00445880_m1 |
| GAPDH       | Hs02758991_g1 |
| KLF5        | Mm00456521_m1 |
| KROX20      | Mm00456650_m1 |
| Leptin      | Mm00434759_m1 |
| Mrf4        | Mm00435126_m1 |
| Myf5        | Mm00435125_m1 |
| MyHC        | Mm01332493_g1 |
| MyoD        | Mm00440387_m1 |
| Myogenin    | Mm00446194_m1 |
| Pax3        | Mm00435491_m1 |
| Pax7        | Mm00834079_m1 |
| PPARg2      | Mm00440940_m1 |
| UCP1        | Mm00494069_m1 |

Copyright of Nature Cell Biology is the property of Nature Publishing Group and its content may not be copied or emailed to multiple sites or posted to a listserv without the copyright holder's express written permission. However, users may print, download, or email articles for individual use.
